# Supplementary material for: Insight into the bioactivity and action mode of betulin, a candidate aphicide from plant metabolite, against aphids
Source: eLife journal article supplement (doi:10.7554/elife.107598), 2025-08-04
Supplement: fig3-data2 [file Figure 3—Source Data 2.pdf › Figure 3—Source Data 2.pdf]

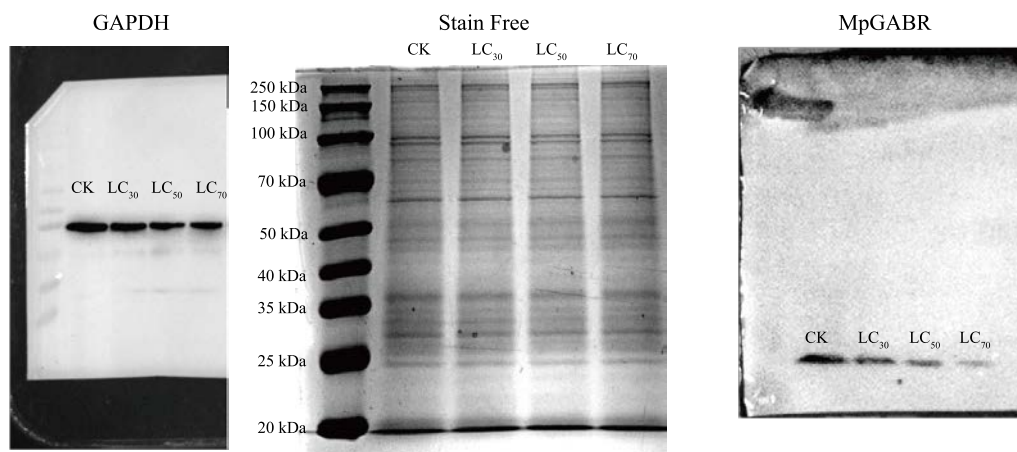

**Figure 3—Source Data 2.** Original membranes corresponding to Figure 3, panel E. GAPDH was used as a reference protein.
