# Supplementary figures and images for: Insight into the bioactivity and action mode of betulin, a candidate aphicide from plant metabolite, against aphids
Source: eLife journal article supplement (doi:10.7554/elife.107598), 2025-08-04

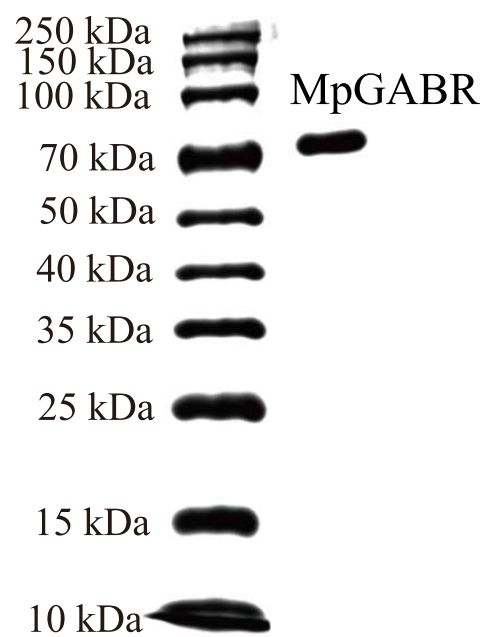

**Figure 6—Source Data 1.** Original gel corresponding to Figure 6, panel A.

Supplement: fig6-data1 [file Figure 6—Source Data 1.pdf › Figure 6—Source Data 1.pdf]

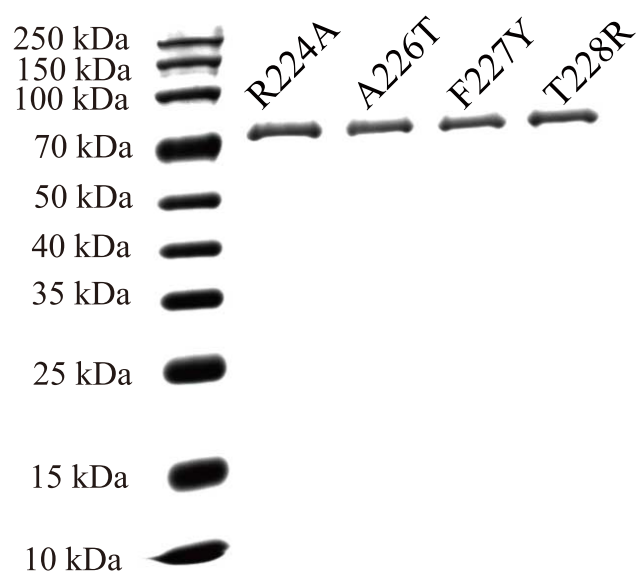

**Figure 7—Source Data 2.** Original gel corresponding to Figure 7, panel C.

Supplement: fig7-data2 [file Figure 7—Source Data 2.pdf › Figure 7—Source Data 2.pdf]

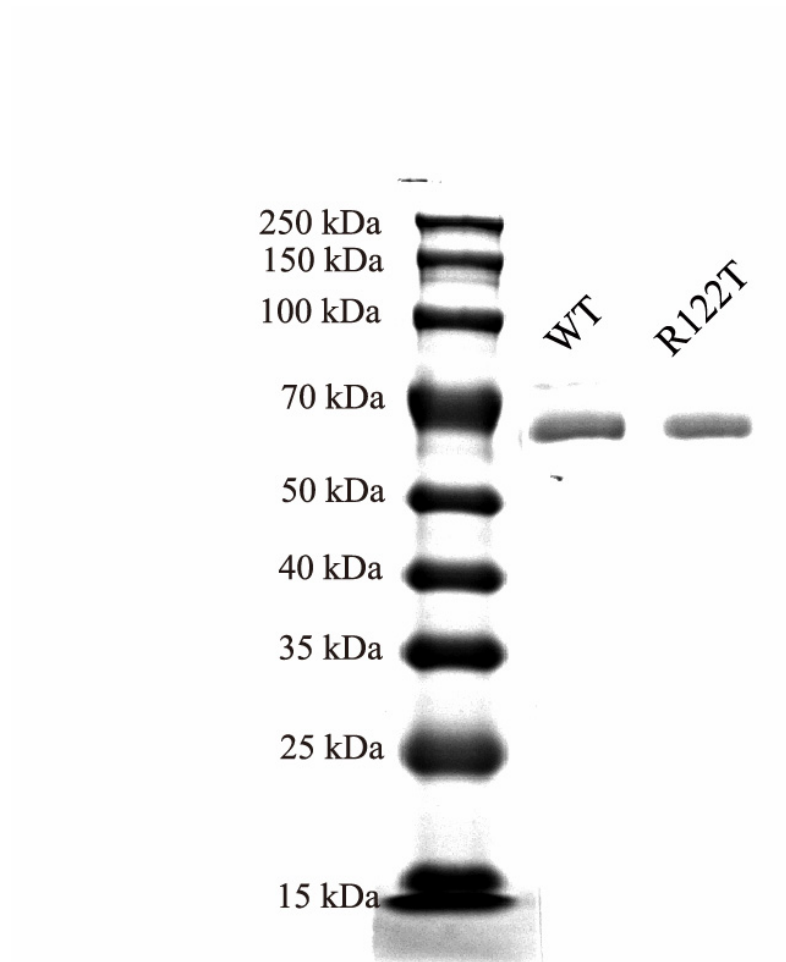

**Figure 8—Source Data 1.** Original gel corresponding to Figure 8, panel A.

Supplement: fig8-data1 [file Figure 8—Source Data 1.pdf › Figure 8—Source Data 1.pdf]
